# Supplementary material
Source: PubMed Central journal article supplement (PMC3568339)
Supplement: 1222047110_pnas.201222047SI.pdf [file 1222047110_pnas.201222047SI.pdf]

# Supporting Information

Kupz et al. 10.1073/pnas.1222047110

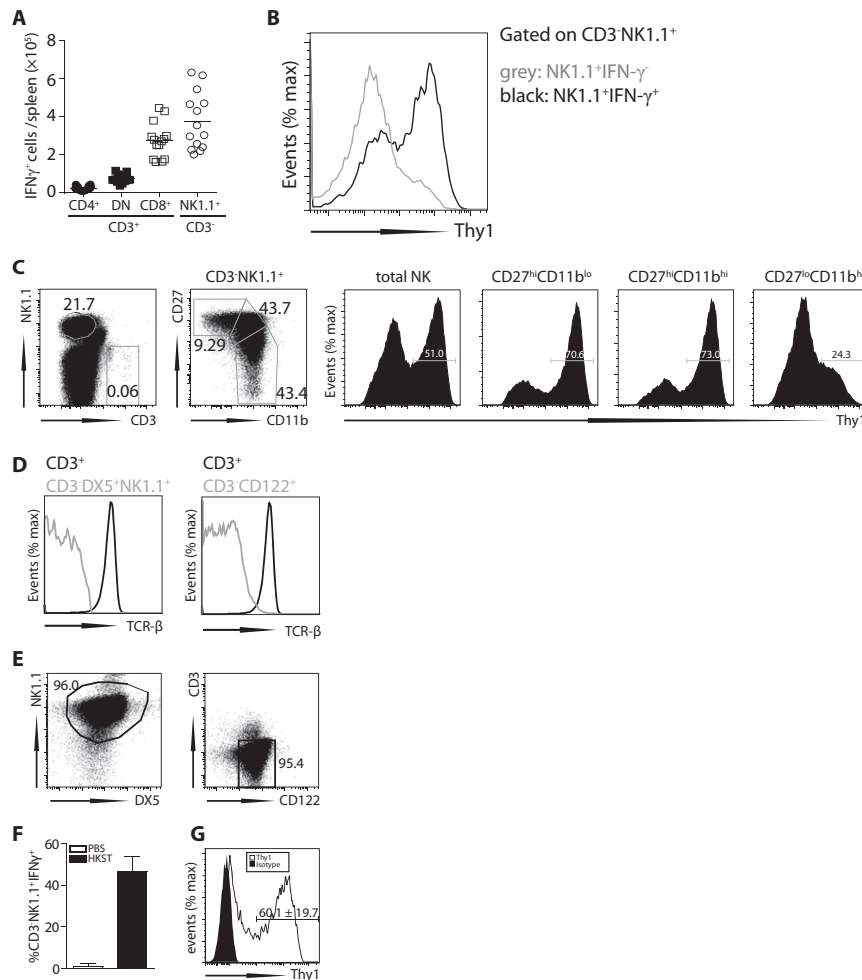

**Fig. S1.** Thy1-expressing natural killer (NK) cells are not T-cell contaminants. (A and B) Naïve B6 mice were i.v. injected with  $1 \times 10^8$  cfu heat-killed *Salmonella enterica* serovar Typhimurium (HKST). IFN- $\gamma$  secretion by lymphocyte subsets was assessed 2 h later in the spleen. IFN- $\gamma$ <sup>+</sup> and IFN- $\gamma$ <sup>-</sup> NK 1.1<sup>+</sup> cells were assessed for expression of Thy1 (B). Total number of IFN- $\gamma$ <sup>+</sup> cells among total CD3<sup>+</sup> and CD3<sup>-</sup> cells (A) and a representative histogram (B) are shown. (C) Viable single splenocytes from *Rag1/Je*<sup>-/-</sup> mice were assessed for expression of Thy1 on different NK cells subsets (CD3<sup>-</sup> NK1.1<sup>+</sup>) defined by the expression of CD27 and CD11b. (D) Expression of T-cell receptor (TCR)- $\beta$  on splenic CD3<sup>+</sup>DX5<sup>+</sup>NK1.1<sup>+</sup> (Left) and CD19<sup>-</sup>CD3<sup>-</sup>CD4<sup>-</sup>CD122<sup>+</sup> (Right) cells in B6 mice in comparison with CD3<sup>+</sup> cells. (E–G) In vitro-activated NK cells from B6 mice were assessed for expression of NK1.1, DX5, CD122, and CD3 (E), the capacity to produce IFN- $\gamma$  in vivo after transfer of two times  $1 \times 10^6$  NK cells into naïve congenic recipients (F), and expression of Thy1 (G). Individual data points from at least three experiments (A) and representative FACS plots (C and E) and histograms (B–D and G) from at least two independent experiments are shown.

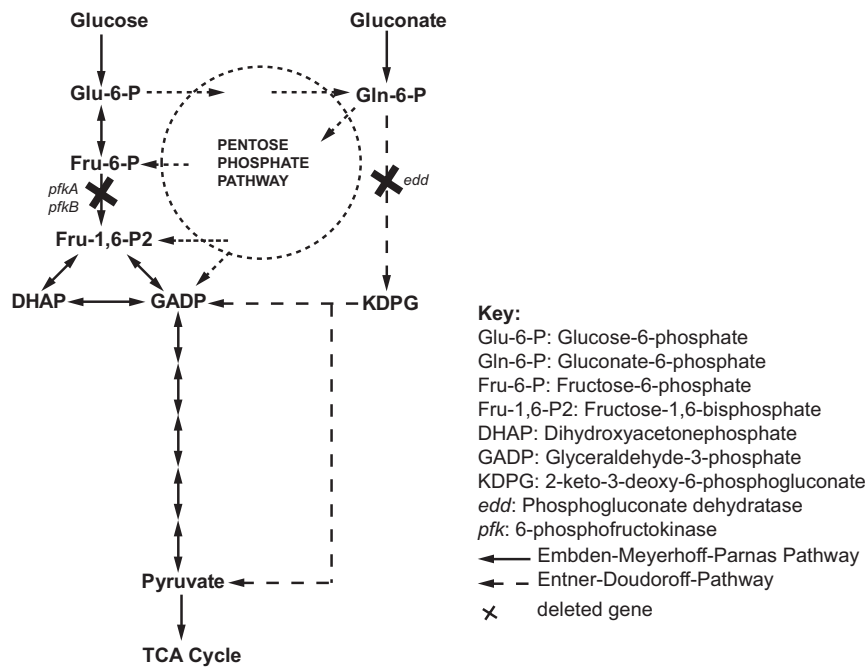

**Fig. S2.** Schematic presentation of mutation sites in SL1344  $\Delta edd \Delta pfkA \Delta pfkB$ . Schematic representation of the central carbon metabolism. Sites of mutations to generate SL1344  $\Delta edd \Delta pfkA \Delta pfkB$  are marked with a black cross.

**Table S1. Overview of mouse strains used in this study**

| Mouse strain                                  | Purpose                                                                                                   |
|-----------------------------------------------|-----------------------------------------------------------------------------------------------------------|
| C57BL/6                                       | WT                                                                                                        |
| CD45.1 (Ly5.1)                                | Congenic cell marker                                                                                      |
| GK1.5Tg (1)                                   | Transgenic expression of anti-GK1.5; CD4 <sup>+</sup> T cell deficient                                    |
| GK1.5/2.43Tg (2)                              | Transgenic expression of anti-GK1.5 and anti-2.43; CD4 <sup>+</sup> and CD8 <sup>+</sup> T cell deficient |
| <i>Rag1/Je<sup>-/-</sup></i> (3)              | Deletion of Rag1; T and B cell deficient                                                                  |
| <i>Rag2<sup>-/-</sup>γc<sup>-/-</sup></i> (4) | Deletion of Rag2 and common γ chain; lymphocyte deficient; NK cell recipient                              |
| <i>IFN-γ<sup>-/-</sup></i> (5)                | Deletion of IFN-γ; highly susceptible to <i>STM</i> infection                                             |
| <i>CD1d<sup>-/-</sup></i> (6)                 | Deletion of CD1d; NKT cell deficient                                                                      |
| μMT (7)                                       | Disruption of Ig μ chain; B cell deficient                                                                |
| <i>ROR-γt<sup>-/-</sup></i> (8)               | Deletion of RORγt; innate lymphoid cell and Th17 deficient                                                |

- Zhan Y, Corbett AJ, Brady JL, Sutherland RM, Lew AM (2000) CD4 help-independent induction of cytotoxic CD8 cells to allogeneic P815 tumor cells is absolutely dependent on costimulation. *J Immunol* 165(7):3612–3619.
- Han WR, et al. (2000) Prolonged allograft survival in anti-CD4 antibody transgenic mice: Lack of residual helper T cells compared with other CD4-deficient mice. *Transplantation* 70(1): 168–174.
- Mombaerts P, et al. (1992) RAG-1-deficient mice have no mature B and T lymphocytes. *Cell* 68(5):869–877.
- Mazurier F, et al. (1999) A novel immunodeficient mouse model—RAG2 3 X common cytokine receptor γ chain double mutants requiring exogenous cytokine administration for human hematopoietic stem cell engraftment. *J IFN Cytokine Res* 19(5):533–541.
- Dalton DK, et al. (1993) Multiple defects of immune cell function in mice with disrupted IFN-γ genes. *Science* 259(5102):1739–1742.
- Schofield L, et al. (1999) CD1d-restricted IgG formation to GPI-anchored antigens mediated by NKT cells. *Science* 283(5399):225–229.
- Kitamura D, Roes J, Kühn R, Rajewsky K (1991) A B-cell-deficient mouse by targeted disruption of the membrane exon of the Ig mu chain gene. *Nature* 350(6317):423–426.
- Eberl G, et al. (2004) An essential function for the nuclear receptor RORγt in the generation of fetal lymphoid tissue inducer cells. *Nat Immunol* 5(1):64–73.

**Table S2. Monoclonal antibodies used for in vivo cell and cytokine depletion**

| Antibody    | Clone     | Injection dose per mouse                  | Source |
|-------------|-----------|-------------------------------------------|--------|
| Anti-CD8    | 2.43      | 250 μg initially then 200 μg twice weekly | WEHI   |
| Anti-CD4    | GK1.5     | 250 μg initially then 200 μg twice weekly | WEHI   |
| Anti-Thy1.2 | 30-H12    | 250 μg initially then 200 μg twice weekly | WEHI   |
| Anti-IFN-γ  | HB-170–15 | 200 μg weekly                             | WEHI   |
| Anti-NK1.1  | PK136     | 250 μg initially then 200 μg twice weekly | WEHI   |

WEHI, Walter and Eliza Hall Institute of Medical Research, Melbourne, Australia.

**Table S3. Oligonucleotides used to generate *Salmonella* Typhimurium SL1344  $\Delta$ *edd*  $\Delta$ *pfkA*  $\Delta$ *pfkB***

| Function                 | Primer name            | Sequence (5' to 3')*                                 |
|--------------------------|------------------------|------------------------------------------------------|
| <i>kan</i> amplification | kanF                   | GTGTAGGCTGGAGCTGCTTC                                 |
|                          | kanR                   | CATATGAATATCCTCCTTAG                                 |
| <i>edd</i> deletion      | <u>edd2(I-SceI)F</u>   | <u>TAGGGATAACAGGGTAATCATCGGAATTCTTCTCTCGC</u>        |
|                          | edd2KanR               | <b>GAAGCAGCTCCAGCCTACACAGTAATGAAGACGTCTGCGGTAC</b>   |
|                          | edd2KanF               | <b>CTAAGGAGGATATTCATATGGGTTTACCATGCGTTTCATC</b>      |
|                          | <u>edaedd(I-SceI)R</u> | <u>TAGGGATAACAGGGTAATGAACAAATTGACGATTCGCCTGC</u>     |
| <i>pfkA</i> deletion     | <u>pfkA(I-SceI)F</u>   | <u>TAGGGATAACAGGGTAATGGTGCAGTCATTATTGGATCG</u>       |
|                          | pfkAKanR               | <b>GAAGCAGCTCCAGCCTACACAGACTACCTCTGAACCTTGGAATGC</b> |
|                          | pfkAKanF               | <b>CTAAGGAGGATATTCATATGACATCATCGATGCGATTG</b>        |
|                          | <u>pfkA(I-SceI)R</u>   | <u>TAGGGATAACAGGGTAATCGTCACGACATCGGCTTC</u>          |
| <i>pfkB</i> deletion     | <u>pfkB(I-SceI)F</u>   | <u>TAGGGATAACAGGGTAATGTCCATACCAGGTCATCG</u>          |
|                          | pfkBKanR               | <b>GAAGCAGCTCCAGCCTACACAGCTTACCTCCTGTTAGGCTG</b>     |
|                          | pfkBKanF               | <b>CTAAGGAGGATATTCATATGTGTTCTCGTGACGATACC</b>        |
|                          | <u>pfkB(I-SceI)R</u>   | <u>TAGGGATAACAGGGTAATGGAATGGCACTTATTGTGC</u>         |

\*I-SceI restriction sites are underlined; *kan*-specific sequences are bold.
